# Supplementary material for: Acquisition of virulence factors in livestock-associated MRSA: Lysogenic conversion of CC398 strains by virulence gene-containing phages
Source: PubMed Central journal article supplement (PMC5435737; doi:10.1038/s41598-017-02175-4), 2017-05-17
Supplement: 41598_2017_2175_MOESM1_ESM.pdf [file 41598_2017_2175_MOESM1_ESM.pdf]

**Acquisition of virulence factors in livestock-associated MRSA: Lysogenic conversion of  
CC398 strains by virulence gene-containing phages**

Britta Kraushaar<sup>1</sup>, Jens Andre Hammerl<sup>1</sup>, Marina Kienöl<sup>1</sup>, Marie Luise Heinig<sup>1</sup>, Nina  
Sperling<sup>1</sup>, Mai Dinh Thanh<sup>1</sup>, Jochen Reetz<sup>1</sup>, Claudia Jäckel<sup>1</sup>, Alexandra Fetsch<sup>1</sup> and Stefan  
Hertwig<sup>1,\*</sup>

## Supplemental Material

**Supplemental Material Figure S1: DNA similarities of the four phages.** Dot plot alignments were performed with the DS Gene software package (v 2.5) of the Accelrys Inc. (USA) by using 65% as a standard parameter for DNA similarity and a hash value of 6. The numbers on the axes give the scale for the genomes in kilo bases.

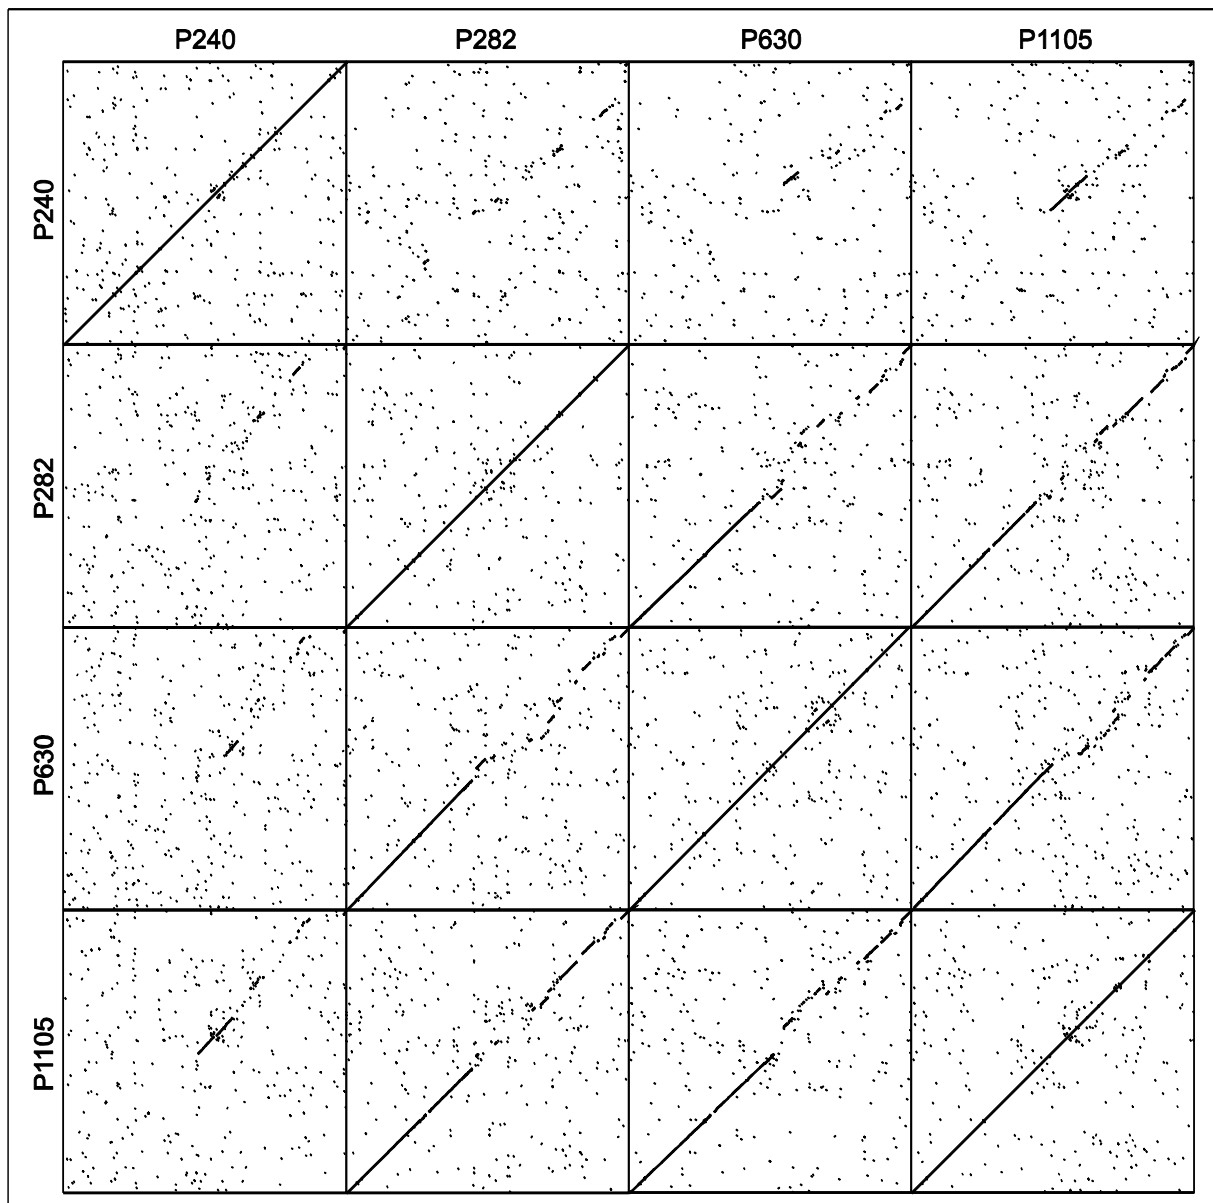

**Supplemental Material Figure S2: Similarities of P1105 to other related phages.** Dot plot alignments were performed with the DS Gene software package of the Accelrys Inc. (USA) by using 65% as a standard parameter for DNA similarity and a hash value of 6. The numbers on the axes give the scale for the genomes in kilo bases. The transition region between homologous and non-homologous DNA sequences is framed by a red box.

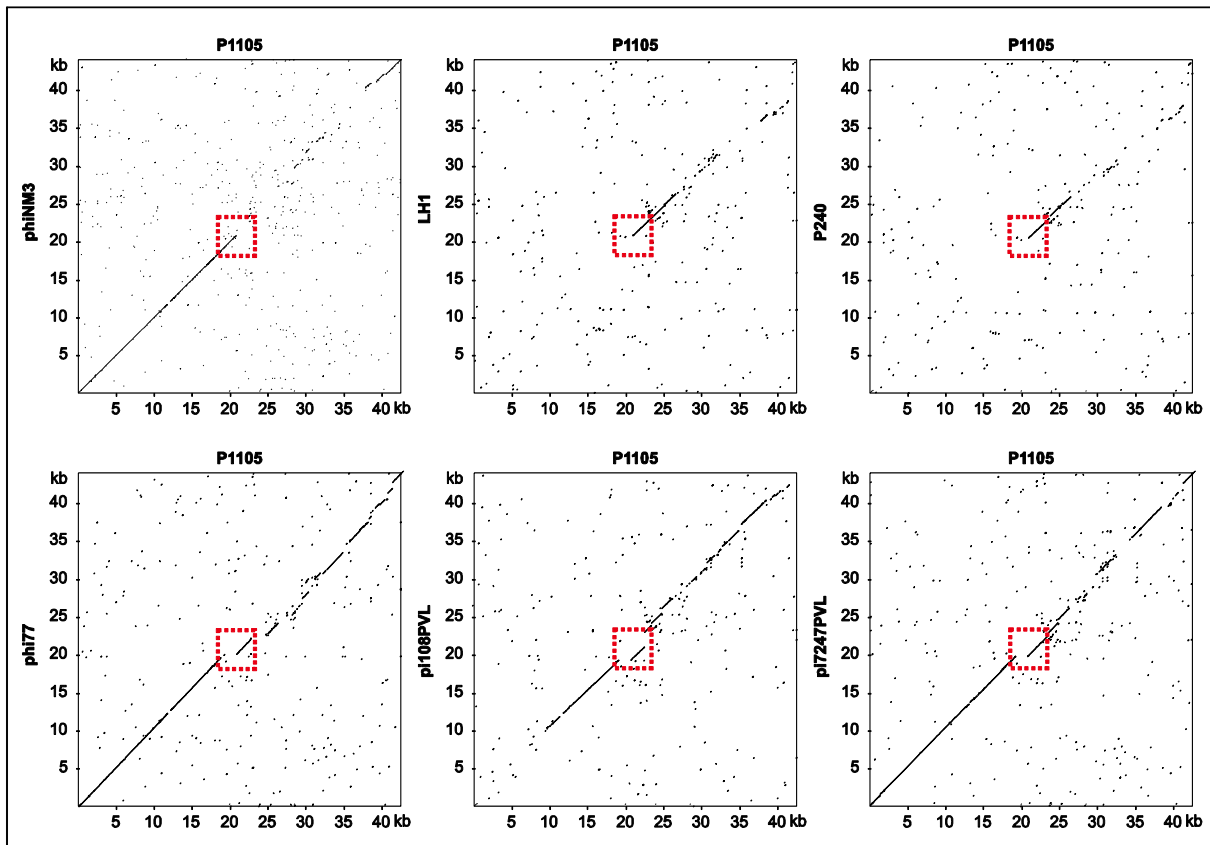

**Supplemental Material Table S1: Livestock-associated CC398 strains used to determine the host range of the phages.**

### Supplemental Material

**Supplemental Material Figure S1: DNA similarities of the four phages.** Dot plot alignments were performed with the DS Gene software package (v 2.5) of the Accelrys Inc. (USA) by using 65% as a standard parameter for DNA similarity and a hash value of 6. The numbers on the axes give the scale for the genomes in kilo bases.

**Supplemental Material Figure S2: Similarities of P1105 to other related phages.** Dot plot alignments were performed with the DS Gene software package of the Accelrys Inc. (USA) by using 65% as a standard parameter for DNA similarity and a hash value of 6. The numbers on the axes give the scale for the genomes in kilo bases. The transition region between homologous and non-homologous DNA sequences is framed by a red box.

**Supplemental Material Table S1: Livestock-associated CC398 strains used to determine the host range of the phages.**

| Strain   | <i>spa</i> type | Origin                 | P282 | P630 | P1105 | P240 |
|----------|-----------------|------------------------|------|------|-------|------|
| 07S00067 | t5675           | swine (nasal swab)     | +    | -    | -     | -    |
| 07S00107 | t2346           | swine (nasal swab)     | +    | -    | -     | +    |
| 07S00108 | t5681           | swine (nasal swab)     | -    | -    | -     | -    |
| 07S00289 | t2346           | swine (nasal swab)     | -    | -    | -     | -    |
| 07S00338 | t5676           | swine (nasal swab)     | -    | -    | +     | -    |
| 07S00396 | t5680           | swine (nasal swab)     | -    | -    | -     | -    |
| 08S00699 | t2997           | swine (dust sample)    | +    | -    | -     | -    |
| 08S00915 | t3423           | swine (meat)           | -    | +    | -     | -    |
| 08S01074 | t2346           | swine (nasal swab)     | -    | -    | -     | -    |
| 08S01077 | t2346           | swine (nasal swab)     | -    | -    | -     | -    |
| 08S01578 | t3479           | swine (nasal swab)     | -    | -    | -     | -    |
| 09S00826 | t5524           | chicken (meat)         | +    | -    | -     | +    |
| 09S01005 | t2346           | cattle (nasal swab)    | +    | -    | -     | -    |
| 09S01007 | t2346           | cattle (nasal swab)    | +    | -    | +     | +    |
| 09S01009 | t2346           | cattle (nasal swab)    | +    | +    | +     | +    |
| 09S01255 | t2330           | turkey (tracheal swab) | -    | -    | -     | -    |
| 09S01385 | t2346           | turkey (meat)          | +    | -    | -     | +    |
| 09S01404 | t5902           | turkey (meat)          | +    | +    | -     | +    |
| 09S01590 | t5119           | turkey (meat)          | -    | -    | -     | -    |
| 09S01727 | t026            | swine (meat)           | -    | -    | -     | -    |
| 09S02250 | t899            | turkey (skin swab)     | +    | -    | -     | +    |
| 09S02459 | t6575           | swine (organs)         | -    | -    | -     | -    |
| 09S02482 | t6574           | turkey (meat)          | +    | +    | -     | +    |
| 09S02531 | t2971           | swine (meat)           | -    | -    | -     | -    |
| 10S00170 | t034            | turkey (meat)          | +    | +    | +     | -    |
| 10S01160 | t2970           | turkey (skin swab)     | -    | -    | -     | -    |
| 10S01468 | t2370           | minced meat            | -    | -    | -     | -    |
| 10S01531 | t2510           | swine (dust sample)    | -    | -    | -     | -    |
| 10S01600 | t779            | swine (dust sample)    | -    | -    | -     | -    |
| 11S00157 | t2510           | swine (dust sample)    | -    | -    | -     | -    |

|            |       |                       |   |   |   |   |
|------------|-------|-----------------------|---|---|---|---|
| 11S00724   | t588  | swine (nasal swab)    | - | - | - | - |
| 11S00742   | t4677 | swine (nasal swab)    | + | - | - | - |
| 11S01169   | t2346 | cattle (nasal swab)   | + | - | + | + |
| 11S01203   | t1580 | chicken (dust sample) | + | + | - | + |
| 11S01539   | t1255 | swine (dust sample)   | + | + | + | + |
| 12S00070   | t2582 | chicken (skin swab)   | + | + | - | - |
| 12S00148   | t2123 | cattle (dust sample)  | + | - | - | + |
| 12S00502   | t2576 | turkey (dust sample)  | + | - | - | - |
| 12S00562   | t4652 | turkey (skin swab)    | - | - | - | - |
| 12S00563   | t2346 | cattle (nasal swab)   | + | - | - | + |
| 12S00746   | t1344 | turkey (skin swab)    | - | - | - | - |
| 12S00887   | t1928 | turkey (dust sample)  | - | - | - | - |
| 12S01090   | t2346 | cattle (nasal swab)   | + | - | - | - |
| 12S01091   | t2346 | cattle (carcass)      | + | - | - | - |
| 12S01431   | t5452 | turkey (dust sample)  | - | - | - | - |
| 12S01487   | t2346 | swine (nasal swab)    | - | - | - | - |
| 13-ST00001 | t034  | turkey (dust sample)  | - | - | - | - |
| 13-ST00003 | t034  | swine (boot swab)     | - | - | - | - |
| 13-ST00007 | t1451 | swine (nasal swab)    | - | - | - | - |
| 13-ST00008 | t108  | swine (nasal swab)    | - | - | - | - |
| 13-ST00009 | t034  | cattle (carcass)      | - | - | - | - |
| 13-ST00010 | t1197 | cattle (carcass)      | - | - | - | - |
| 13-ST00013 | t034  | minced meat           | + | - | - | - |
| 13-ST00015 | t034  | turkey (dust sample)  | + | - | - | - |
| 13-ST00024 | t011  | cattle (nasal swab)   | + | - | - | - |
| 13-ST00026 | t011  | cattle (nasal swab)   | - | - | - | - |
| 13-ST00027 | t6325 | cattle (carcass)      | - | - | - | - |
| 13-ST00029 | t034  | cattle (carcass)      | + | + | - | - |
| 13-ST00030 | t2346 | cattle (carcass)      | + | - | + | + |
| 13-ST00042 | t108  | swine (nasal swab)    | - | - | - | - |
| 13-ST00043 | t034  | swine (nasal swab)    | + | - | - | - |
| 13-ST00053 | t034  | turkey (dust sample)  | - | - | - | - |
| 13-ST00054 | t011  | turkey (dust sample)  | + | - | - | + |

|            |       |                     |   |   |   |   |
|------------|-------|---------------------|---|---|---|---|
| 13-ST00065 | t1197 | cattle (carcass)    | - | - | - | - |
| 13-ST00089 | t5452 | turkey (skin swab)  | - | - | - | - |
| 13-ST00090 | t034  | turkey (skin swab)  | + | + | - | - |
| 13-ST00093 | t011  | cattle (carcass)    | - | - | - | - |
| 13-ST00117 | t2876 | turkey (skin swab)  | - | - | - | - |
| 13-ST00193 | t216  | rabbit (organs)     | - | - | - | - |
| 13-ST00195 | t011  | chicken (meat)      | - | - | - | + |
| 13-ST00207 | t1456 | cattle (nasal swab) | + | - | - | + |
| 13-ST00385 | t571  | cattle (nasal swab) | - | - | - | - |
